# Supplementary material for: Interaction of SO2 with a Cu–Mn oxide oxygen carrier during chemical looping with oxygen uncoupling
Source: Royal Society of Chemistry journal article supplement (doi:10.1039/d3re00498h), 2024-01-01
Supplement: d3re00498h1.pdf [file d3re00498h1.pdf]

### Supplementary Information

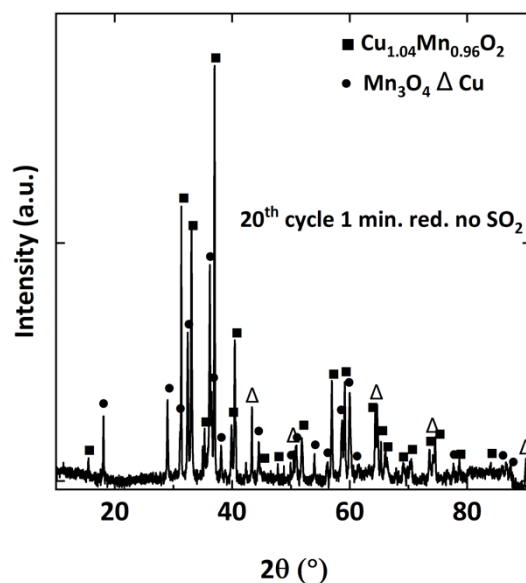

Figure S1. XRD patterns of samples reduced for 1 minute for 20 cycles at 900°C with 9%  $\text{CH}_4$ -balance  $\text{N}_2$ .

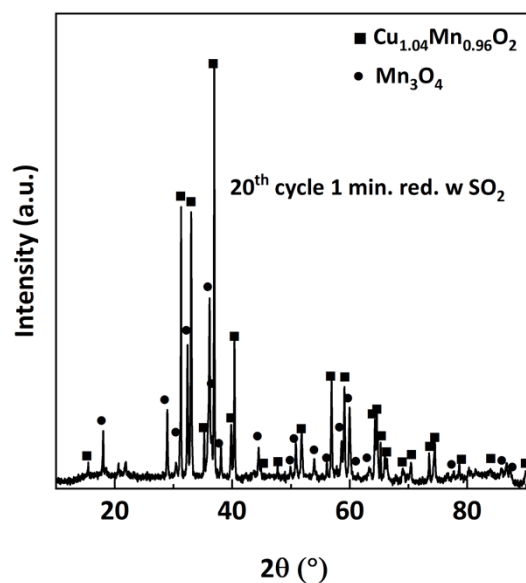

Figure S2. XRD patterns of samples reduced for 1 minute for 20 cycles at 900°C with 9%  $\text{CH}_4$ -5000 ppm  $\text{SO}_2$ -balance  $\text{N}_2$ .

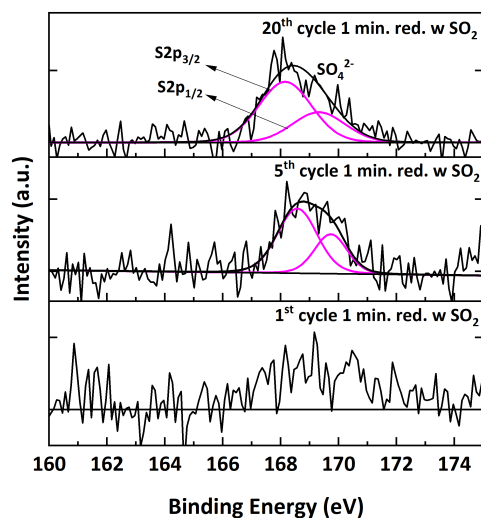

Figure S3. S 2p spectra of samples reduced for 1 minute for 1, 5 and 20 cycles at 900°C with 9%CH<sub>4</sub>-5000ppm SO<sub>2</sub>-balance N<sub>2</sub>.

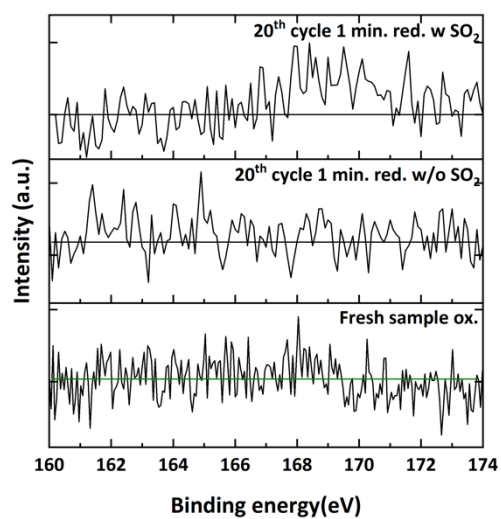

Figure S4. S 2p spectra of fresh sample and oxidized samples after 20 cycles at 900°C with 9%CH<sub>4</sub>-balance N<sub>2</sub> and 9%CH<sub>4</sub>-5000ppm SO<sub>2</sub>-balance N<sub>2</sub>.

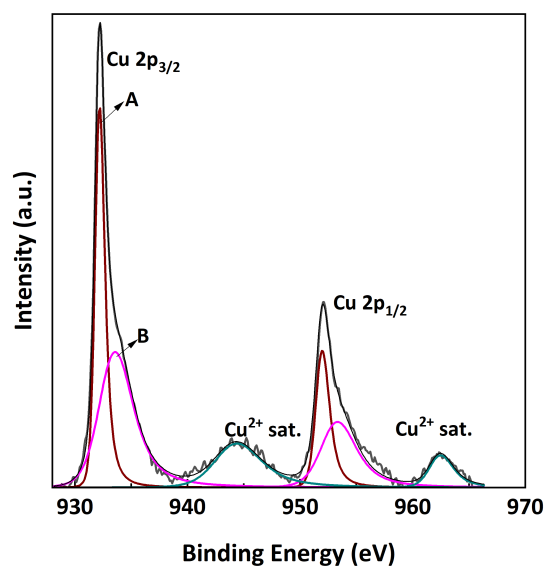

Figure S5. C Cu 2p spectra of a sample reduced for 1 minute for 1 cycle at 900°C with 9%CH<sub>4</sub>-balanced N<sub>2</sub>.

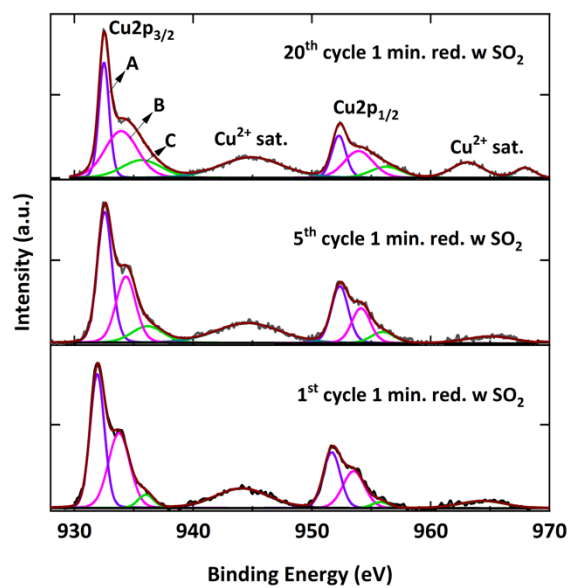

Figure S6. Cu 2p spectra of samples reduced for 1 minute for 1, 5 and 20 cycles at 900°C with 9%CH<sub>4</sub>-5000ppm SO<sub>2</sub>-balance N<sub>2</sub>.
